# Supplementary material for: New Cu+2 Complexes with N-Sulfonamide Ligands: Potential Antitumor, Antibacterial, and Antioxidant Agents
Source: MDPI journal article supplement (doi:10.3390/molecules27103338), 2022-05-23
Supplement: s1 [file s1]

Supplementary materials

# New Cu<sup>+2</sup> Complexes with N-Sulfonamide Ligands: Potential Antitumor, Antibacterial, and Antioxidant Agents

Adriana Corina Hangan <sup>1</sup>, Alexandru Turza <sup>2</sup>, Roxana Liana Lucaciu <sup>3,\*</sup>, Bogdan Sevastre <sup>4</sup>, Emőke Páll <sup>4</sup>,  
Luminița Simona Oprean <sup>1</sup> and Gheorghe Borodi <sup>2</sup>

<sup>1</sup> Department of Inorganic Chemistry, Faculty of Pharmacy, "Iuliu-Hațieganu" University of Medicine and Pharmacy, 400012 Cluj-Napoca, Romania; acoma6@yahoo.com (A.C.H.); loprean@umfcluj.ro (L.S.O.)

<sup>2</sup> National Institute for Research and Development of Isotopic and Molecular Technologies, 400293 Cluj-Napoca, Romania; turzaalex@yahoo.com (A.T.); borodi@itim-cj.ro (G.B.)

<sup>3</sup> Department of Pharmaceutical Biochemistry and Clinical Laboratory, Faculty of Pharmacy, "Iuliu-Hațieganu" University of Medicine and Pharmacy, 400012 Cluj-Napoca, Romania

<sup>4</sup> Paraclinic/Clinic Department, Faculty of Veterinary Medicine, University of Agricultural Science and Veterinary Medicine, 400372 Cluj-Napoca, Romania; bogdan.sevastre@usamvcluj.ro (B.S.); emoke.pall@usamvcluj.ro (E.P.)

\* Correspondence: roxanaluc@yahoo.com

**Table S1.** Selected bond lengths (Å) and angles (°) for the complex **C1**.

| Bond                      | d<br>(Å) | Bond                      | d (Å) | Angle<br>(°)      | Angle<br>(°)           |
|---------------------------|----------|---------------------------|-------|-------------------|------------------------|
| N2A-C11A<br>(thiadiazole) | 1.315    | N2B-C11B<br>(thiadiazole) | 1.323 | N1A-S1A-O2A<br>8  | N1B-S1B-O2B<br>107.30  |
| N3A-C12A<br>(thiadiazole) | 1.299    | N3B-C12B<br>(thiadiazole) | 1.297 | N1A-S1A-O1A<br>3  | N1B-S1B-O1B<br>112.76  |
| C11A-S2A<br>(thiadiazole) | 1.752    | C11B-S2B<br>(thiadiazole) | 1.745 | N1A-S1A-C8A<br>1  | N1A-S1A-C8A<br>106.73  |
| C12A-S2A<br>(thiadiazole) | 1.736    | C12B-S2B<br>(thiadiazole) | 1.731 | O2A-S1A-C8A<br>2  | O2B-S1B-C8B<br>105.94  |
| N2A-N3A<br>(thiadiazole)  | 1.380    | N2B-N3B<br>(thiadiazole)  | 1.388 | O1A-S1A-C8A<br>6  | O1A-S1A-C8A<br>106.08  |
| N1A-C11A                  | 1.355    | N1B-C11B                  | 1.342 | O1A-S1A-O2A<br>6  | O1B-S1B-O2B<br>117.32  |
| N1A-S1A                   | 1.602    | N1B-S1B                   | 1.601 | C11A-N1A-S1A<br>7 | C11A-N1A-S1A<br>121.99 |
| S1A-O2A                   | 1.441    | S1B-O2B                   | 1.437 | N2A-C11A-N1A<br>2 | N2B-C11B-N1B<br>120.40 |
| S1A-O1A                   | 1.452    | S1B-O1B                   | 1.441 | S1A-C11A-N1A<br>4 | S1B-C11B-N1B<br>128.24 |
| S1A-C8A                   | 1.759    | S1B-C8B                   | 1.775 | N2A-Cu1-O1W       | N2B-Cu1-O1W<br>92.20   |

|         |       |         |       |             |       |             |       |
|---------|-------|---------|-------|-------------|-------|-------------|-------|
| Cu1-N2A | 2.012 | Cu1-N2B | 2.013 | N2A-Cu1-O3W | 88.99 | N2B-Cu1-O3W | 87.89 |
| Cu1-O1W | 2.002 |         |       | O2W-Cu1-O3W | 92.09 | O2W-Cu1-O1W | 86.61 |
| Cu1-O2W | 2.435 |         |       |             |       |             |       |
| Cu1-O3W | 1.982 |         |       |             |       |             |       |

**Table S2.** Selected bond lengths (Å) and angles (°) for complex **C2**.

| Bond                    | d (Å) | Angle      | (°)    |
|-------------------------|-------|------------|--------|
| N2-C11<br>(thiadiazole) | 1.323 | N1-S1-O2   | 113.10 |
| N3-C12<br>(thiadiazole) | 1.273 | N1-S1-O1   | 106.52 |
| C11-S2<br>(thiadiazole) | 1.757 | N1-S1-C8   | 106.04 |
| C12-S2<br>(thiadiazole) | 1.741 | O2-S1-C8   | 107.06 |
| N2-N3<br>(thiadiazole)  | 1.386 | O1-S1-C8   | 106.75 |
| N1-C11                  | 1.332 | O1-S1-O2   | 116.71 |
| N1-S1                   | 1.590 | C11-N1-S1  | 120.62 |
| S1-O2                   | 1.444 | N2-C11-N1  | 120.86 |
| S1-O1                   | 1.447 | S1-C11-N1  | 129.05 |
| S1-C8                   | 1.770 | N2-Cu1-O1W | 96.87  |
| Cu1-N2                  | 1.987 | N2-Cu1-N4  | 86.81  |
| Cu1-O1W                 | 2.285 | O1W-Cu1-N4 | 91.67  |
| Cu1-N4                  | 2.064 |            |        |

**Table S3.** Hydrogen bonds geometries in investigated crystals (Å, °).

| Structure  | D-H...A        | D-H   | H...A    | D...A    | <(D-H...A) |
|------------|----------------|-------|----------|----------|------------|
| Complex C1 | O1W-H1WB...O2B | 0.872 | 2.135(4) | 2.965(3) | 158.8(8)   |
|            | O2W-H2WB...N1A | 0.858 | 2.163(2) | 2.893(1) | 142.8(3)   |
|            | O2W-H2WA...N1B | 0.859 | 2.219(1) | 2.927(3) | 139.6(1)   |
|            | C3B-H3B...O1B  | 0.930 | 2.498(1) | 3.317(2) | 147.0(5)   |
|            | C2B-H2B...S2B  | 0.930 | 2.826(4) | 3.722(1) | 161.9(5)   |
|            | C19-H19B...O1A | 0.960 | 2.512(3) | 3.457(6) | 168.5(6)   |
| Complex C2 | O1W-H1WA...O1  | 0.850 | 2.118(4) | 2.950(1) | 165.7(8)   |
|            | O2D-H2D...O1B  | 0.970 | 2.546(6) | 4.773(4) | 143.9(1)   |

**Table S4:** Minimum inhibitory concentration of copper complexes.

| Bacterial strains                           | MIC (mg/l) |            |
|---------------------------------------------|------------|------------|
|                                             | C1 complex | C2 complex |
| <i>Staphylococcus aureus</i><br>ATCC 6538P  | 0.289      | 0.202      |
| <i>Bacillus cerreus</i><br>ATCC 14579       | 0.304      | 0.293      |
| <i>Escherichia coli</i><br>ATCC 10536       | 0.231      | 0.184      |
| <i>Pseudomonas aeruginosa</i><br>ATCC 27853 | 0.196      | 0.089      |

**Table S5.** The influence of complex C2 on biochemical parameters

| Group  | ALAT<br>(U/L) | ASAT<br>(U/L) | Total protein<br>(g/dL) | Albumin<br>(g/dL) | Creatinine<br>(mg/dL) | Urea<br>(mg/dL) |
|--------|---------------|---------------|-------------------------|-------------------|-----------------------|-----------------|
| Male   | 44.27±1.25    | 169.48±3.66   | 5.88±0.31               | 3.29±0.42         | 0.56±0.12             | 19.36±2.12      |
| Female | 56.49±2.18    | 195.29±4.21   | 6.12±0.14               | 3.87±0.55         | 0.67±0.15             | 21.27±3.23      |

Normal values: ALAT 26-77U/L, ASAT 54-269 U/L, Total protein 3.5-7.2g/dL, Albumin 2.5-4.8g/dL, Creatinine 0.3-1 mg/dL, Urea 12-28 mg/dL (Mean±S.E.M.) (n=5) [48]

**Table S6.** The influence of complex C2 on erythrogram

| Group  | RBC<br>( $10^{12}/L$ ) | HGB<br>(g/dL) | HCT<br>(%) | MCH<br>(pg) | MCHC<br>(g/dL) | MCV<br>(fl) | RDWs<br>(fl) |
|--------|------------------------|---------------|------------|-------------|----------------|-------------|--------------|
| Male   | 9.19±0.63              | 13.62±1.022   | 43.28±2.01 | 16.25±0.17  | 32.86±0.49     | 47.26±1.99  | 34.37±1.03   |
| Female | 9.54±1.03              | 14.71±1.21    | 45.06±2.88 | 16.78±0.76  | 32.83±0.55     | 48.98±2.63  | 36.29±1.25   |

RBC: red blood cells; HGB: haemoglobin; HCT: hematocrit; MCH: mean corpuscular haemoglobin; MCHC: mean corpuscular haemoglobin concentration; MCV: mean corpuscular volume; RDW: red blood cells distribution width; Normal values: RBC 7-12.5  $10^{12}/L$ , HGB 10.2-16.6 g/dL, HCT 39-49 % (Mean±S.E.M.) (n=5) [48]

**Table S7.** The influence of complex C2 on leukogram

| Group  | WBC<br>( $10^9/L$ ) | LYM<br>( $10^9/L$ ) | GRA<br>( $10^9/L$ ) | MID<br>( $10^9/L$ ) |
|--------|---------------------|---------------------|---------------------|---------------------|
| Male   | 9.67±1.21           | 6.51±0.99           | 2.42±0.89           | 0.29±0.07           |
| Female | 10.55±1.01          | 6.98±0.76           | 2.82±1.03           | 0.33±0.15           |

WBC: white blood cells; LYM: lymphocytes; GRA: granulocytes; MID: middle cells; Normal value: WBC 6-15  $10^9/L$  (Mean±S.E.M.) (n=5) [48]

**Table S8.** The influence of complex C2 on thrombogram

| Group  | PLT<br>( $10^6/L$ ) | PCT<br>(%) | MPV<br>(fl) | PDWs<br>(fl) |
|--------|---------------------|------------|-------------|--------------|
| Male   | 922.20±100.11       | 0.62±0.12  | 6.78±0.34   | 7.33±0.19    |
| Female | 944.96±136.39       | 0.75±0.24  | 7.59±0.82   | 8.99±1.06    |

PLT: total platelet count; PCT: platelet hematocrit; MPV: mean platelet volume; PDWs: platelet distribution width; Normal value: PLT 800-1100  $10^6/L$  (Mean±S.E.M.)(n=5) [48]

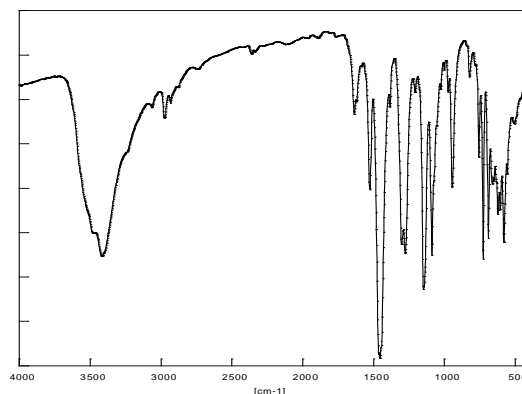**Figure S1.** IR spectrum of the complex C1

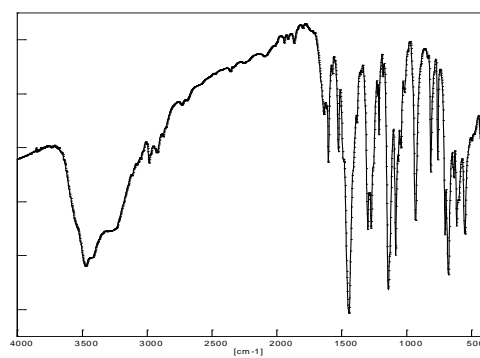

**Figure S2.** IR spectrum of the complex **C2**

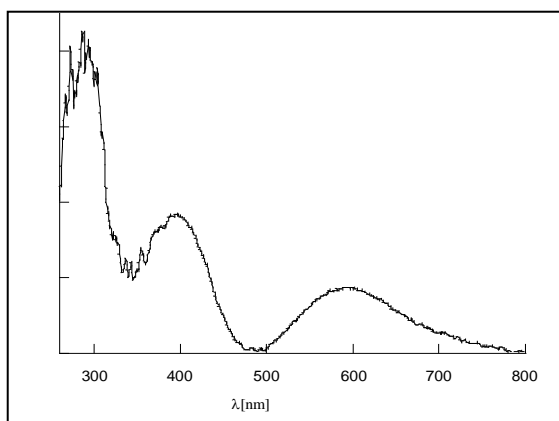

**Figure S3.** UV-VIS spectrum of the complex **C1**

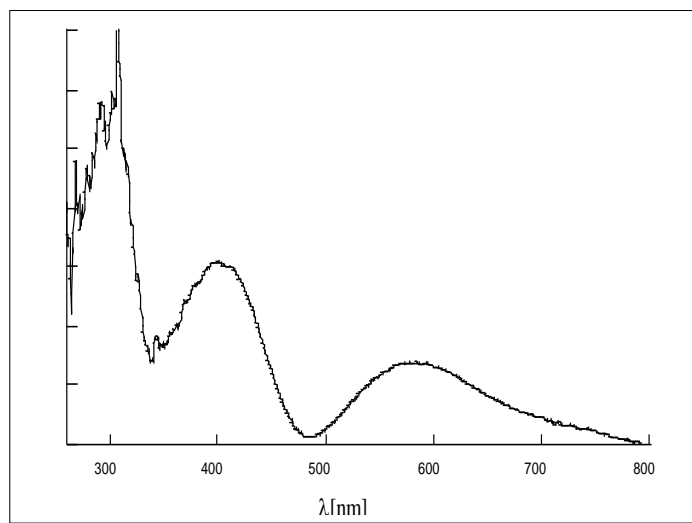

**Figure S4.** UV-VIS spectrum of the complex **C2**

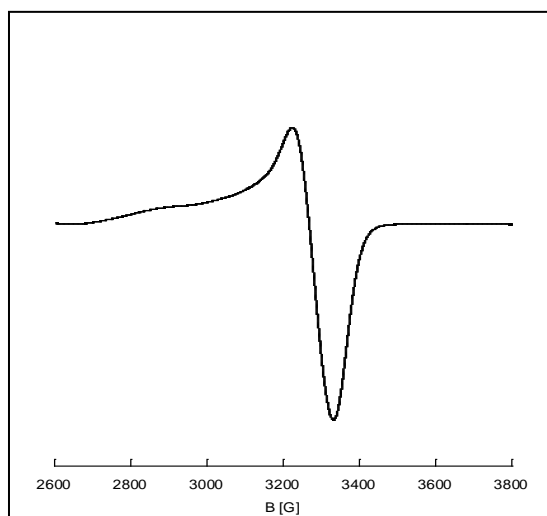

**Figure S5.** RES spectrum of the complex **C1**

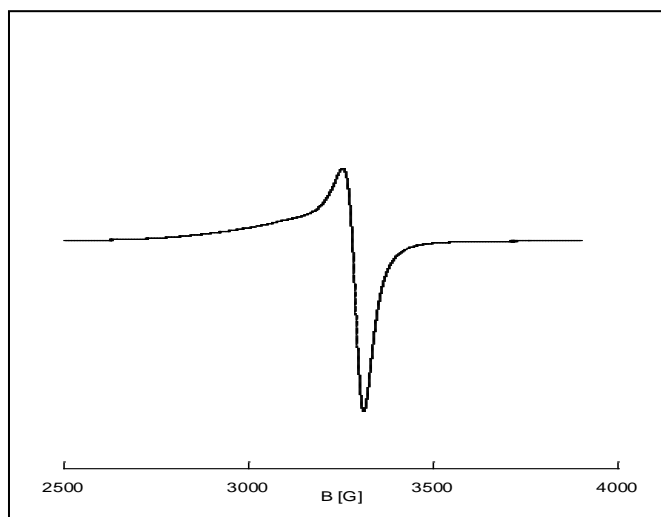

**Figure S6.** RES spectrum of the complex **C2**

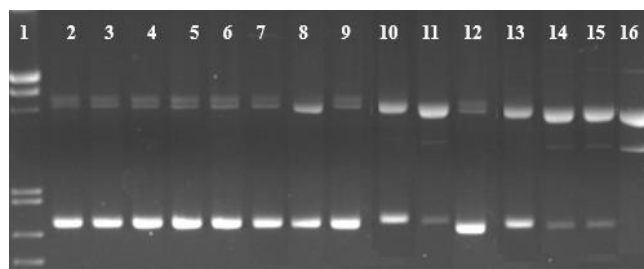

**Figure S7.** Electroferogram in agarose gel of the pUC18 plasmid treated with CuSO<sub>4</sub>, the C1 and C2 complexes and bis(o-phenanthroline) copper(II).  
 1.base marker; 2.control; 3.control+red.; 4.5μM CuSO<sub>4</sub>+red.; 5.10μM CuSO<sub>4</sub>+red.; 6.15μM CuSO<sub>4</sub>+ red.; 7.20μM CuSO<sub>4</sub>+red.; 8. 5μM C1+red.; 9.10μM C1+red.; 10.15μM C1+red.; 11.20μM C1+red.; 12. 5μM C2+red.; 13.10 μM C2+red.; 14.15 μM C2+red.; 15.20μM C2+red.; 16.20μM [Cu(phen)<sub>2</sub>]<sup>2+</sup>+ red.

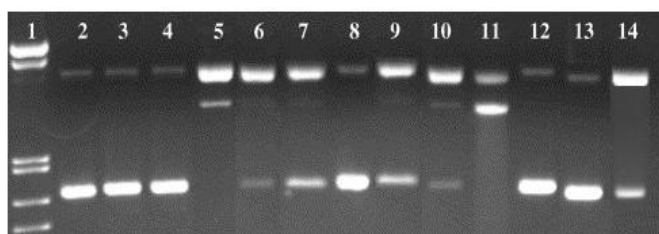

**Figure S8.** Electroferogram in agarose gel of the pUC18 plasmid treated with the C1 and C2 complexes and various inhibiting agents.  
 1.base marker; 2. control; 3. complex C1 10μM without inhibitors+ reducing agents ; 4. complex C2 10μM without inhibitors+ reducing agents; 5. C1 + DMSO+ reducing agents; 6. C1 + SOD + reducing agents; 7. C1 + distamycin + reducing agents; 8. C1 + neocuproine + reducing agents; 9. C1 + NaN<sub>3</sub> + reducing agents; 10. C2 + DMSO+ reducing agents; 11. C2 + SOD + reducing agents; 12. C2 + distamycin + reducing agents; 13. C2 + neocuproine + reducing agents; 14. C2 + NaN<sub>3</sub> + reducing agents

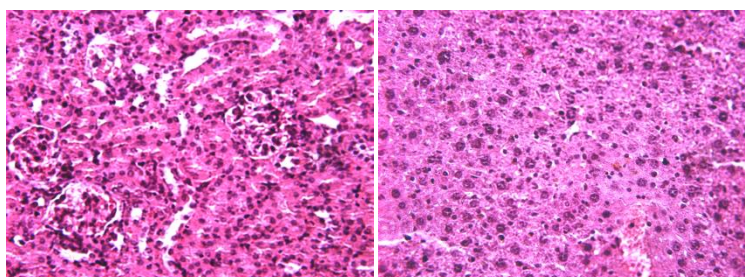



**Figure S9.** Histological analyses of renal cortical (left) and hepatic lobe (right). HE (x200)
